# Supplementary material for: Early Exotic Vegetation Development Is Affected by Vine Plants and Bird Activity at Rapidly Exposed Floodplains in South Korea
Source: MDPI journal article supplement (doi:10.3390/biology12050696), 2023-05-09
Supplement: s1 [file s1]

## Supplementary data

**Table S1.** List of dominant species observed around the floodplains of Gongju, Sejong, and Seungchon weirs in Autumn 2020

| Vegetation property  | Family         | Dominant species                 | Abb. | Life form | Area (m <sup>2</sup> ) | Ratio (%) |
|----------------------|----------------|----------------------------------|------|-----------|------------------------|-----------|
| Native vegetation    | Cannabaceae    | <i>Humulus japonicus</i>         | Hj   | Vine      | 3,105                  | 0.5       |
|                      | Leguminosae    | <i>Pueraria lobata</i>           | Pl   | Vine      | 714                    | 0.1       |
|                      |                | <i>Lespedeza cuneata</i>         | Lc   | Perennial | 20,472                 | 3.2       |
|                      | Compositae     | <i>Artemisia princeps</i>        | Ap   | Perennial | 2,436                  | 0.4       |
|                      | Cyperaceae     | <i>Cyperus amuricus</i>          | Ca   | Annual    | 3,362                  | 0.5       |
|                      | Gramineae      | <i>Phragmites communis</i>       | Pc   | Perennial | 117,397                | 18.1      |
|                      |                | <i>Phalaris arundinacea</i>      | Par  | Perennial | 1,303                  | 0.2       |
|                      |                | <i>Setaria viridis</i>           | Sv   | Annual    | 7,464                  | 1.1       |
|                      |                | <i>Phragmites japonica</i>       | Pj   | Perennial | 18,942                 | 2.9       |
|                      |                | <i>Miscanthus sacchariflorus</i> | Ms   | Perennial | 177,781                | 27.4      |
|                      |                | <i>Pennisetum alopecuroides</i>  | Pal  | Perennial | 12,107                 | 1.9       |
|                      |                | <i>Salix koreensis</i>           | Sk   | Woody     | 204,207                | 31.4      |
|                      |                | <i>Salix chaenomeloides</i>      | Sc   | Woody     | 77,992                 | 12.0      |
|                      | Moraceae       | <i>Morus alba</i>                | Ma   | Woody     | 818                    | 0.1       |
|                      | Polygonaceae   | <i>Persicaria nodosa</i>         | Pn   | Annual    | 1,486                  | 0.2       |
| Sub total            | -              | -                                | -    | -         | 649,586                | 17.5      |
| Exotic vegetation    | Cucurbitaceae  | <i>Sicyos angulatus</i>          | Sa   | Vine      | 11,892                 | 16.2      |
|                      | Leguminosae    | <i>Vicia villosa</i>             | Vv   | Vine      | 1,467                  | 2.0       |
|                      |                | <i>Robinia pseudoacacia</i>      | Rp   | Woody     | 23,392                 | 31.9      |
|                      | Hamamelidaceae | <i>Liquidambar styraciflua</i>   | Ls   | Woody     | 916                    | 1.3       |
|                      | Compositae     | <i>Xanthium strumarium</i>       | Xs   | Annual    | 1,687                  | 2.3       |
|                      |                | <i>Coreopsis lanceolata</i>      | Cl   | Perennial | 33,967                 | 46.3      |
| Sub total            | -              | -                                | -    | -         | 73,321                 | 2.0       |
| Plantation           | -              | Shrub                            | -    | -         | 44,472                 | 12.1      |
|                      | -              | Tree and sub tree                | -    | -         | 322,829                | 87.9      |
| Sub total            |                |                                  |      |           | 367,301                | 9.9       |
| Sand bar             | -              | -                                | -    | -         | 273,122                | 7.4       |
| Artificial structure | -              | -                                | -    | -         | 646,936                | 17.5      |
| Water body           | -              | -                                | -    | -         | 1,691,195              | 45.7      |
| Total                | -              | -                                | -    | -         | 3,701,461              | 100.0     |

**Table S2.** Exotic species appearing in seed banks, collected within the high and low levels of floodplains

| Family           | Scientific name                                     | No. of ind.<br>In the low level | No. of ind.<br>In the high level |
|------------------|-----------------------------------------------------|---------------------------------|----------------------------------|
| Amaranthaceae    | <i>Celosia cristata</i> L.                          | -                               | 1                                |
| Brassicaceae     | <i>Lepidium apetalum</i> Willd.                     | -                               | 7                                |
|                  | <i>Thlaspi arvense</i> L.                           | -                               | 1                                |
| Chenopodiaceae   | <i>Chenopodium ficifolium</i> Smith                 | 24                              | 27                               |
| Compositae       | <i>Erigeron annuus</i> Pers.                        | 18                              | 31                               |
|                  | <i>Senecio vulgaris</i> L.                          | 1                               | -                                |
|                  | <i>Ambrosia trifida</i> L.                          | 1                               | 77                               |
|                  | <i>Bidens frondosa</i> L.                           | 3                               | 2                                |
|                  | <i>Lactuca scariola</i> L.                          | -                               | 41                               |
| Convolvulaceae   | <i>Quamoclit coccinea</i> Moench                    | -                               | 1                                |
| Gramineae        | <i>Bromus tectorum</i> L.                           | 2                               | -                                |
|                  | <i>Panicum dichotomiflorum</i> Michx.               | 12                              | -                                |
| Leguminosae      | <i>Trifolium repens</i> L.                          | 20                              | -                                |
|                  | <i>Phaseolus vulgaris</i> var. <i>humilis</i> Alef. | -                               | 1                                |
| Onagraceae       | <i>Oenothera biennis</i> L.                         | -                               | 2                                |
| Phytolaccaceae   | <i>Phytolacca americana</i> L.                      | -                               | 1                                |
| Polygonaceae     | <i>Rumex crispus</i> L.                             | 232                             | 85                               |
| Rosaceae         | <i>Potentilla supina</i> L.                         | 3                               | 16                               |
| Scrophulariaceae | <i>Veronica arvensis</i> L.                         | 4                               | 25                               |

**Table S3.** List of avifauna observed around the floodplains of Gongju, Sejong, and Seungchon weirs in 2018

| Family            | Scientific name                              | Korean name | Status <sup>a,b</sup> | No. of ind. | Body size <sup>b</sup> (cm) | Sorting by size <sup>c</sup> |
|-------------------|----------------------------------------------|-------------|-----------------------|-------------|-----------------------------|------------------------------|
| Anatidae          | <i>Aix galericulata</i> (Linnaeus)           | 원앙          | Res                   | 64          | 45                          | Large                        |
|                   | <i>Anas poecilorhyncha</i> Forster           | 흰뺨검둥오리      | Res/WV                | 178         | 61                          | Large                        |
| Ardeidae          | <i>Butorides striata</i> (Linnaeus)          | 검은댕기해오라기    | SV                    | 1           | 52                          | Large                        |
|                   | <i>Egretta garzetta</i> (Linnaeus)           | 쇠백로         | SV                    | 77          | 61                          | Large                        |
|                   | <i>Ardea cinerea</i> Linnaeus                | 왜가리         | Res                   | 112         | 93                          | Large                        |
|                   | <i>Ardea alba</i> Linnaeus                   | 중대백로        | SV/WV                 | 86          | 90                          | Large                        |
|                   | <i>Egretta intermedia</i> (Wagler)           | 중백로         | SV                    | 2           | 68                          | Large                        |
|                   | <i>Nycticorax nycticorax</i> (Linnaeus)      | 해오라기        | SV                    | 2           | 57                          | Large                        |
|                   | <i>Bubulcus ibis</i> (Linnaeus)              | 황로          | SV                    | 62          | 50                          | Large                        |
| Charadriidae      | <i>Charadrius dubius</i> Scopoli             | 꼬마물떼새       | SV                    | 2           | 16                          | Small                        |
| Columbidae        | <i>Streptopelia orientalis</i> (Latham)      | 멧비둘기        | Res                   | 45          | 33                          | Small                        |
|                   | <i>Columba livia domestica</i>               | 집비둘기        | Res                   | 178         | 32.5                        | Small                        |
| Coraciidae        | <i>Eurystomus orientalis</i> (Linnaeus)      | 파랑새         | SV                    | 8           | 29.5                        | Small                        |
| Corvidae          | <i>Pica pica</i> (Linnaeus)                  | 까치          | Res                   | 108         | 46                          | Large                        |
|                   | <i>Cyanopica cyanus</i> (Pallas)             | 물까치         | Res                   | 20          | 37                          | Small                        |
|                   | <i>Corvus macrorhynchos</i> Wagler           | 큰부리까마귀      | Res                   | 22          | 57                          | Large                        |
| Cuculidae         | <i>Cuculus canorus</i> Linnaeus              | 빠꾸기         | SV                    | 1           | 35                          | Small                        |
| Emberizidae       | <i>Emberiza cioides</i> Brandt               | 멧새          | Res                   | 1           | 16                          | Small                        |
| Falconidae        | <i>Falco subbuteo</i> Linnaeus               | 새호리기        | SV                    | 1           | 34.25                       | Small                        |
|                   | <i>Falco tinnunculus</i> Linnaeus            | 황조롱이        | Res                   | 7           | 35.75                       | Small                        |
| Hirundinidae      | <i>Cecropis daurica</i> (Laxmann)            | 귀제비         | SV                    | 2           | 19                          | Small                        |
|                   | <i>Hirundo rustica</i> Linnaeus              | 제비          | SV                    | 27          | 18                          | Small                        |
| Laniidae          | <i>Lanius bucephalus</i> Temminck & Schlegel | 때까치         | Res                   | 3           | 20                          | Small                        |
| Motacillidae      | <i>Motacilla grandis</i> Sharpe              | 검은등할미새      | Res                   | 2           | 21                          | Small                        |
|                   | <i>Motacilla alba</i> Linnaeus               | 알락할미새       | Res                   | 2           | 19.5                        | Small                        |
| Muscicapidae      | <i>Phoenicurus aureus</i> (Pallas)           | 딱새          | Res                   | 2           | 14                          | Small                        |
| Oriolidae         | <i>Oriolus chinensis</i> Linnaeus            | 꼬꼬리         | SV                    | 4           | 26                          | Small                        |
| Paridae           | <i>Parus major</i> Linnaeus                  | 박새          | Res                   | 22          | 14                          | Small                        |
| Passeridae        | <i>Passer montanus</i> (Linnaeus)            | 참새          | Res                   | 441         | 14.5                        | Small                        |
| Phalacrocoracidae | <i>Phalacrocorax carbo</i> (Linnaeus)        | 민물가마우지      | Res/WV                | 21          | 82                          | Large                        |
| Phasianidae       | <i>Phasianus colchicus</i> Linnaeus          | 꿩           | Res                   | 2           | 70                          | Large                        |
| Picidae           | <i>Dendrocopos kizuki</i> (Temminck)         | 쇠딱다구리       | Res                   | 2           | 15                          | Small                        |
| Pycnonotidae      | <i>Microscelis amaurotis</i> (Temminck)      | 직박구리        | Res                   | 34          | 34                          | Small                        |
| Scolopacidae      | <i>Actitis hypoleucos</i> (Linnaeus)         | 갯작도요        | PM                    | 5           | 20                          | Small                        |
|                   | <i>Tringa ochropus</i> Linnaeus              | 백백도요        | PM                    | 1           | 23                          | Small                        |
|                   | <i>Tringa glareola</i> Linnaeus              | 알락도요        | PM                    | 1           | 20                          | Small                        |
| Timaliidae        | <i>Paradoxornis webbianus</i> (Gould)        | 붉은머리오목눈이    | Res                   | 292         | 13                          | Small                        |
| Upupidae          | <i>Upupa epops</i> Linnaeus                  | 후투티         | SV                    | 1           | 28                          | Small                        |

a : Res - Resident, SV - Summer Visitor, WV - Winter Visitor, PM - Passage Migrant

b : Lee, W.S.; Koo, T.H.; Park, J.Y.; Taniguchi, T. A field guide to the birds of Korea; LG Evergreen Foundation: Seoul, South Korea, 2014

c : Small - body size ≤ 40 cm, Large - body size > 40 cm
